# Supplementary material for: Effect of Acetylation on the Nanofibril Formation of Chitosan
Source: Preprints.org preprint supplement (doi:10.20944/preprints202312.1333.v2), 2023-12-21
Supplement: Supplementary file 1 [file supplementary]

# **Supporting Information:**

## **Effect of Acetylation on the Nanofibril Formation of Chitosan**

Aarion Romany,<sup>†</sup> Gregory F. Payne,<sup>‡</sup> and Jana Shen<sup>\*,†</sup>

<sup>†</sup> *Department of Pharmaceutical Sciences, University of Maryland School of Pharmacy,  
Baltimore, MD 21201*

<sup>‡</sup> *Institute for Bioscience and Biotechnology Research, University of Maryland, College  
Park, MD 20742*

E-mail: [jana.shen@rx.umaryland.edu](mailto:jana.shen@rx.umaryland.edu)

## List of Figures

|    |                                                                                                                      |     |
|----|----------------------------------------------------------------------------------------------------------------------|-----|
| S1 | Time series of the interchain hydrogen bond formation of chitosan chains<br>at 20% DA . . . . .                      | S-3 |
| S2 | Time series of the interchain hydrogen bond formation of chitosan chains<br>at 50% and alternating pattern . . . . . | S-4 |
| S3 | Free energy as a function of radius of gyration and intermolecular hbonds<br>per unit. . . . .                       | S-5 |

## Supplemental figures

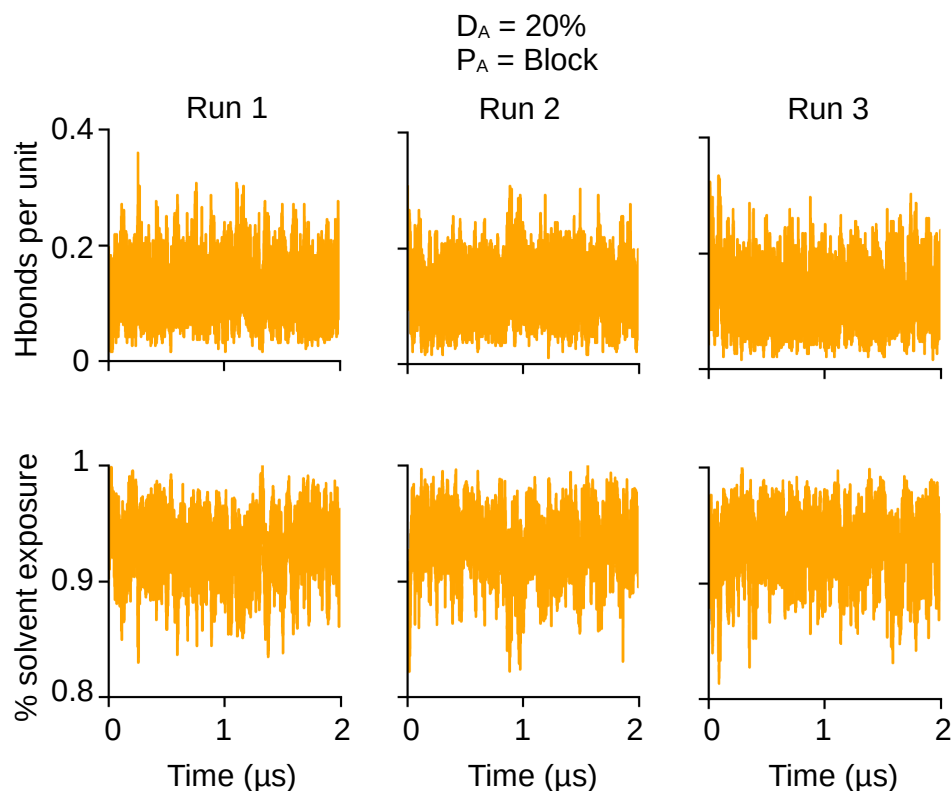

Figure S1: **Number of the interchain hydrogen bonds per acetylglucosamine (GlcAc) unit and percent solvent exposure at 20% DA as a function of simulation time.** A hydrogen bond is considered present if the heavy-atom donor-acceptor distance is below 3.5 Å and the donor-hydrogen-acceptor angle greater than 135°. Note, all 24 chains were used at each temperature. % solvent exposure is calculated as the solvent accessibility surface area (SASA) divided by the SASA of a fully solvent exposed chain. SASA is calculated using the LCPO algorithm of Weiser et al.<sup>?</sup>

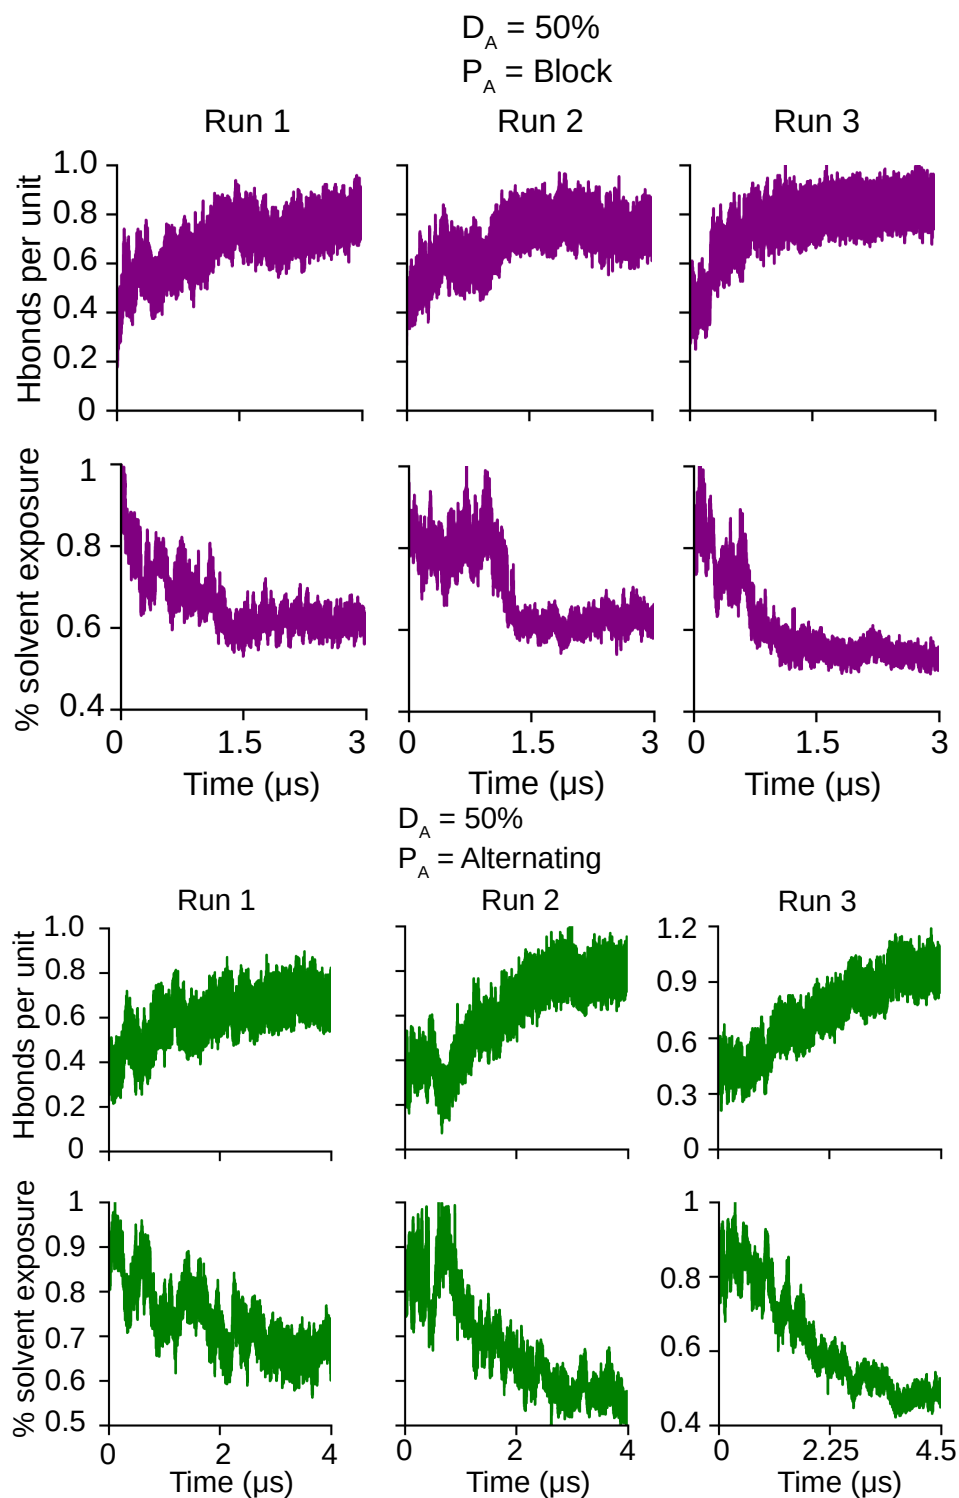

Figure S2: **Number of the interchain hydrogen bonds per acetylglucosamine (GlcAc) unit and percent solvent exposure as a function of simulation time for 50% DA chitosan chains with the block (top) and alternating (bottom) PA.**

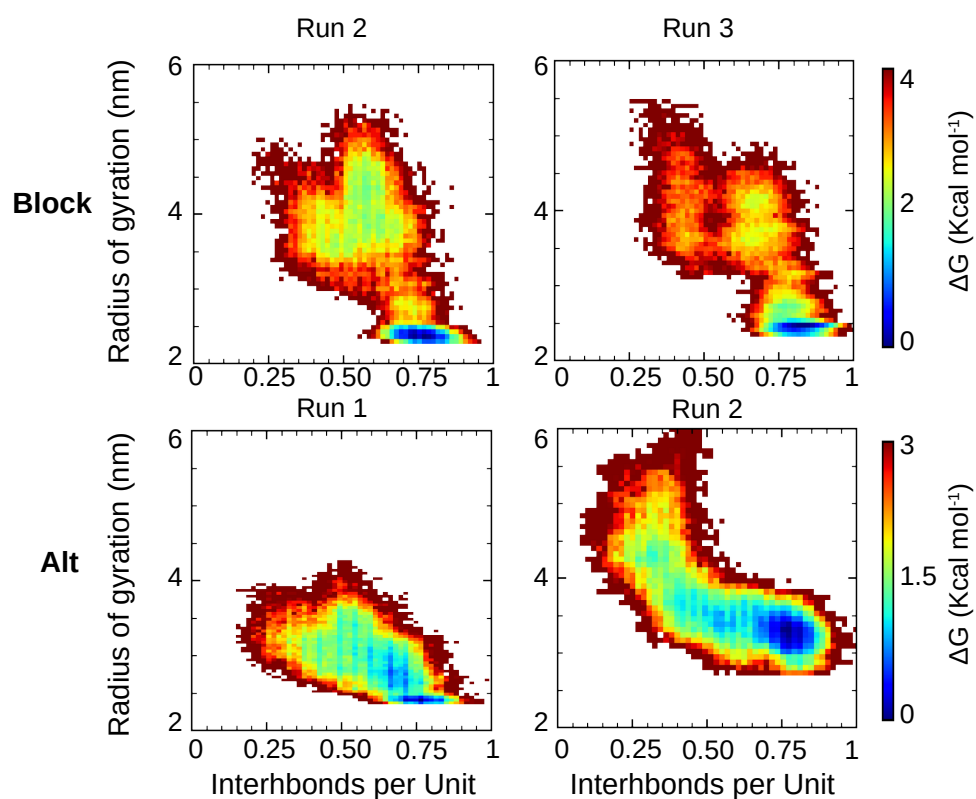

Figure S3: **Free energy as a function of the radius of gyration and intermolecular hbonds per unit for all runs of block and alternating pattern chitosan at 50% DA.** The entire simulation length was used in this calculation for each run.
